# Supplementary material for: Canonical Zn–Zn pseudo-triple bond with double aromaticity in D 5h -Zn 2 Na 5 − cluster
Source: Royal Society of Chemistry journal article supplement (doi:10.1039/d5dt01407g), 2025-11-21
Supplement: d5dt01407g1.pdf [file d5dt01407g1.pdf]

*Supporting Information*

**Canonical Zn-Zn pseudo-triple bond with double  
aromaticity in  $D_{5h}$ - $Zn_2Na_5^-$  cluster**

*Xinluo Wu<sup>a</sup>, Xingman Liu<sup>a,\*</sup>, Lifang Yan<sup>a</sup>, Yue Huang<sup>a</sup>, Xiaomeng Wang<sup>a,\*</sup>, Zhongmin Su<sup>b,\*</sup>*

**Address:**

<sup>a</sup> School of Chemistry and Chemical Engineering, School of Physics, Ningxia University, Yinchuan 750021, China

<sup>b</sup> State Key Laboratory of Supramolecular Structure and Materials, Institute of Theoretical Chemistry, College of Chemistry, Jilin University, Changchun 130021, China

**\*Corresponding Authors:**

**E-mail address:**

liuxm2020@nxu.edu.cn (X. M. Liu); xiaomengwang@nxu.edu.cn (X. M. Wang);  
zmsu@nenu.edu.cn (Z. M. Su);

# Table of Contents

## 1. Supplementary figures

- 1.1. **Figure. S1.** Structures and relative energies of  $\text{Zn}_2\text{Na}_5^-$ .
- 1.2. **Figure. S2.** Structures and relative energies of  $\text{Zn}_2\text{Li}_5^-$ .
- 1.3. **Figure. S3.** The important front molecular orbital of  $\text{C}_{2h}\text{-Zn}_2\text{Li}_6$  and  $\text{C}_{2h}\text{-Zn}_2\text{Na}_6$ .
- 1.4. **Figure. S4.** Schematic of the ten lone pairs of AdNDP patterns for  $\text{D}_{5h}\text{-Zn}_2\text{Na}_5^-$ .
- 1.5. **Figure. S5.** The dominant FMO correlation diagram in  $\text{Zn}_2\text{Na}_5^-$  between  $\text{Zn}_2$  and  $\text{Na}_5^-$  fragments.
- 1.6. **Figure. S6.** Schematic of the AdNDP patterns for  $\text{C}_s\text{-Zn}_2\text{Li}_5^-$ .
- 1.7. **Figure. S7.** Only  $\sigma$  and except  $\sigma$  separated LOL of  $\text{D}_{5h}\text{-Zn}_2\text{Na}_5^-$ .
- 1.8. **Figure. S8.** The contribution of each atom towards the Zn-Zn ELF basin in  $\text{D}_{5h}\text{-Zn}_2\text{Na}_5^-$ .
- 1.9. **Figure. S9.** The contribution of each atom towards the Zn-Zn ELF basin in  $\text{C}_s\text{-Zn}_2\text{Li}_5^-$ .
- 1.10. **Figure. S10.** Natural orbitals of  $\text{D}_{5h}\text{-Zn}_2\text{Na}_5^-$  from CASSCF(10,13).

## 2. Supplementary tables

- 2.1. **Table S1.** The lowest vibrational frequencies of  $\text{D}_{5h}\text{-Zn}_2\text{Na}_5^-$ ,  $\text{C}_s\text{-Zn}_2\text{Li}_5^-$ .
- 2.2. **Table S2.** The data of the common molecular structure parameters under TPSSh/6-311++G(d,p).
- 2.3. **Table S3.** The data of the common molecular structure parameters under M06-2X/def2-TZVP.
- 2.4. **Table S4a-d.** Detailed orbital component analysis results of  $\text{D}_{5h}\text{-Zn}_2\text{Na}_5^-$ ,  $\text{C}_s\text{-Zn}_2\text{Li}_5^-$ ,  $\text{C}_{2h}\text{-Zn}_2\text{Li}_6$  and  $\text{C}_{2h}\text{-Zn}_2\text{Na}_6$ .
- 2.5. **Table S5.** Detailed the AIM topological parameters in TPSSh/6-311++G(d,p).

## 3. Supplementary scheme

**Scheme S1.** Cartesian coordinates of the optimized geometries.

## 1. Supplementary figures

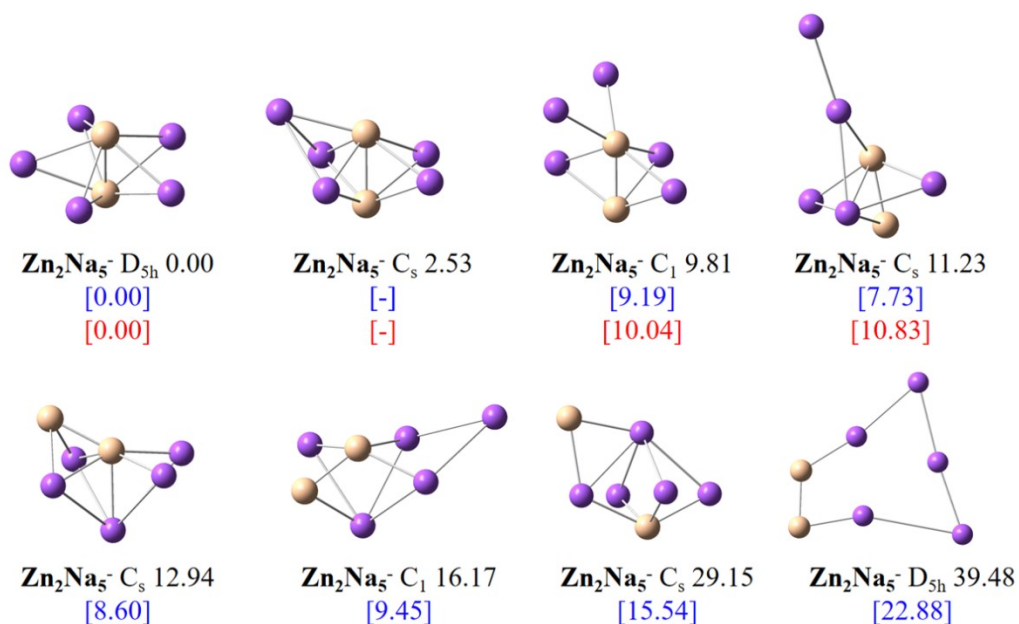

**Figure S1.** Optimized geometries of the isomers of  $\text{Zn}_2\text{Na}_5^-$  cluster. Relative energies (kcal/mol) are computed at B3LYP/6-31G(d) level of theory. The energy values (kcal/mol) shown in blue were calculated at the CCSD/6-311G(d)/ LANL2DZ level (LANL2DZ for Zn, 6-311G(d) for Na) and the energy values (kcal/mol) shown in red were calculated at the TPSSH/6-311++G(d,p) level.

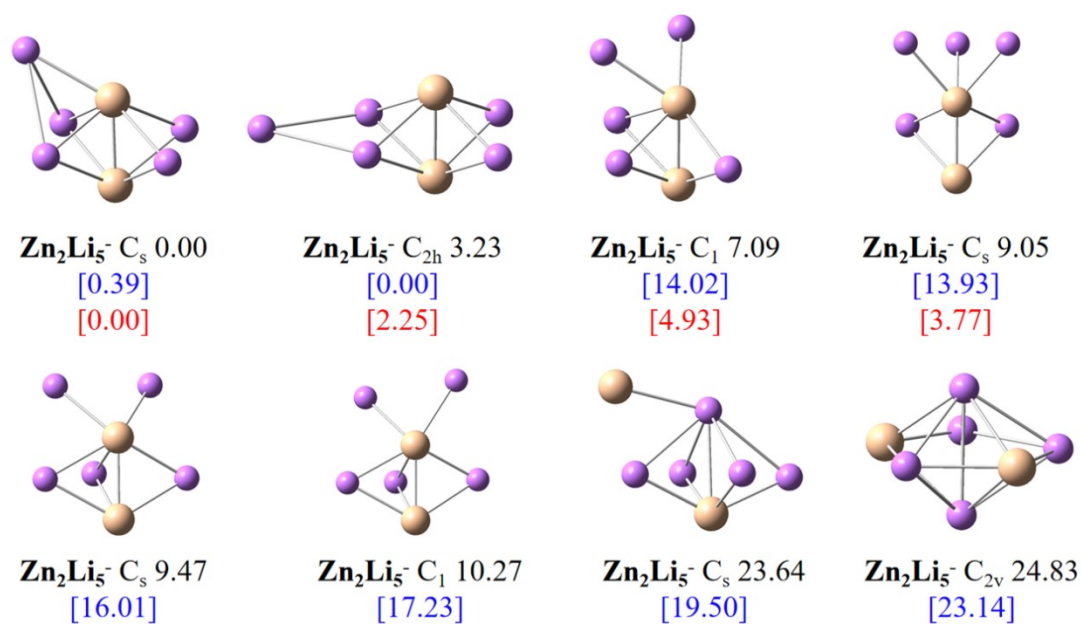

**Figure S2.** Optimized geometries of the isomers of  $\text{Zn}_2\text{Li}_5^-$  cluster. Relative energies (kcal/mol) are computed at B3LYP/6-31G(d) level of theory. The energy values (kcal/mol) shown in blue were calculated at the CCSD/6-311G(d)/LANL2DZ level (LANL2DZ for Zn, 6-311G(d) for Li) and the energy values (kcal/mol) shown in red were calculated at the TPSSH/6-311++G(d,p) level.

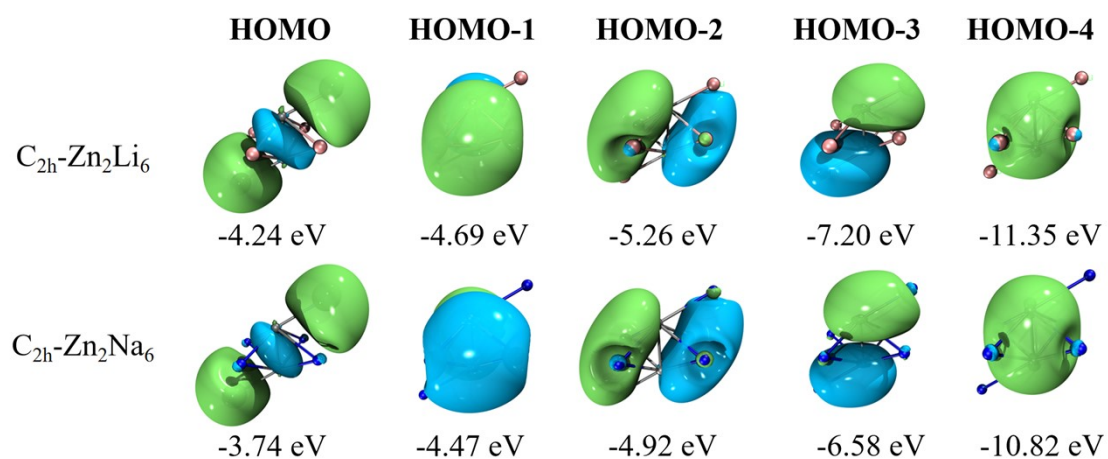

**Figure S3.** The important FMOs of  $C_{2h}\text{-Zn}_2\text{Li}_6$  and  $C_{2h}\text{-Zn}_2\text{Na}_6$  structures. Computed at the CCSD/6-311G(d)/LANL2DZ level (LANL2DZ for Zn, 6-311G(d) for Na, Li).

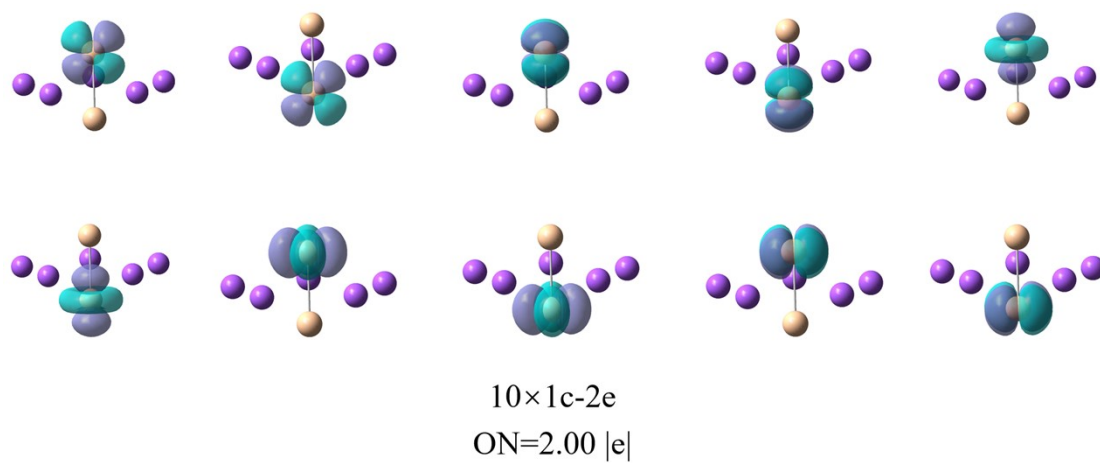

**Figure S4.** Ten lone pairs of electrons occupy the d orbital of Zn.

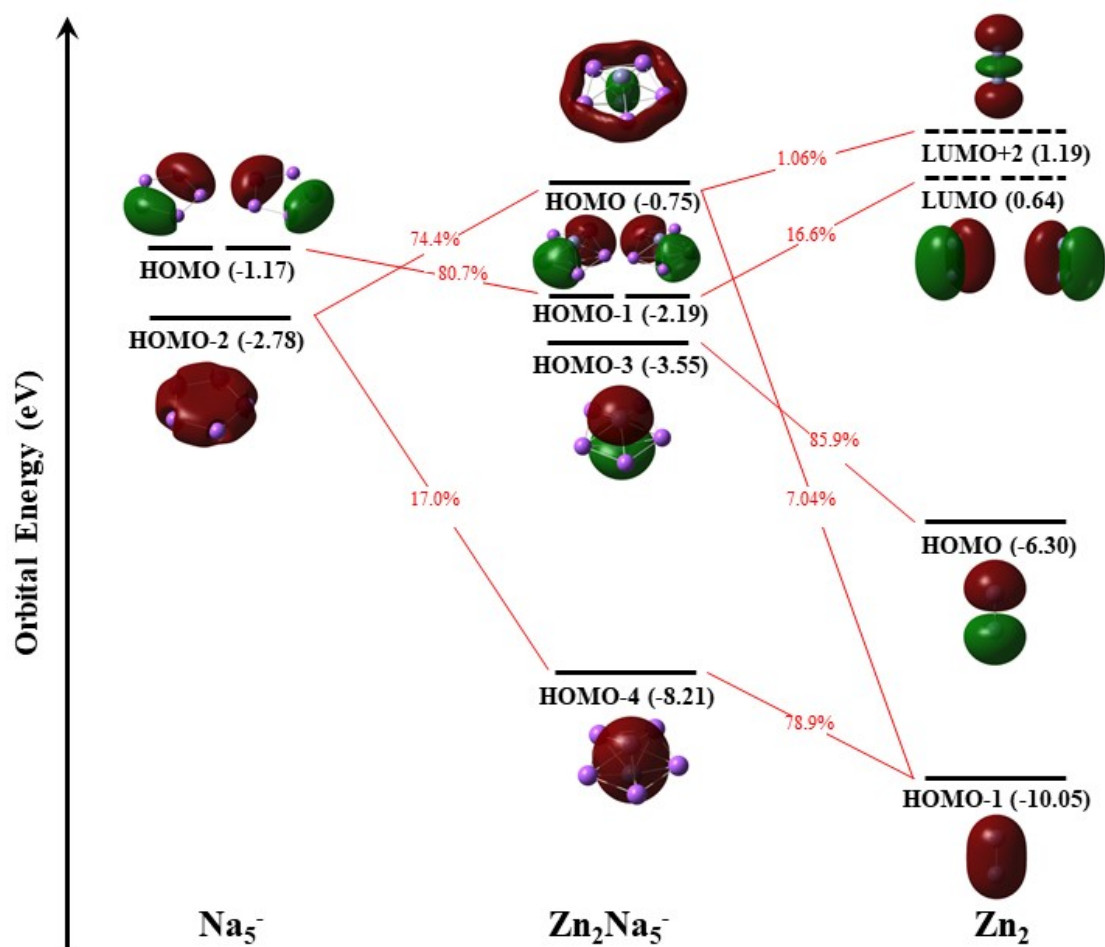

**Figure S5.** The dominant FMO correlation diagram of  $D_{5h}$ - $Zn_2Na_5^-$  between  $Na_5^-$  and  $Zn_2$  fragments calculated at the CCSD/6-311G(d)/LANL2DZ level. The horizontal dashed and solid lines represent virtual and occupied molecular orbitals, respectively (the orbital energies are also given in brackets, unit: eV). It can be observed that the  $Na_5^-$  delocalized (HOMO-2) orbital lie in the equatorial plane contribute 74.4% to the  $\sigma$  orbital of Zn-Zn (HOMO) in  $D_{5h}$ - $Zn_2Na_5^-$ .

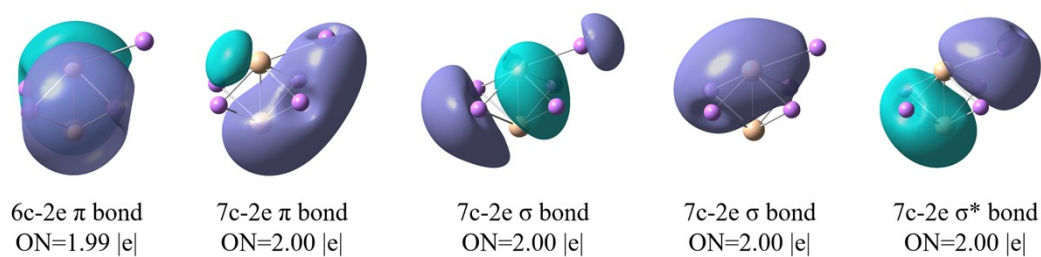

**Figure S6.** AdNDP orbitals of  $C_{5s}\text{-Zn}_2\text{Li}_5^-$  cluster. Occupation numbers (ON) are also shown, the unit is |e|. Computed at CCSD/6-311G(d)/LANL2DZ level of theory.

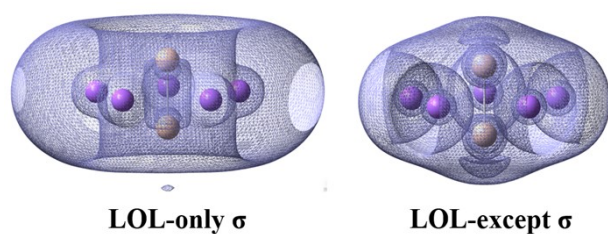

**Figure S7.** Only  $\sigma$  and except  $\sigma$  separated LOL of  $D_{5h}\text{-Zn}_2\text{Na}_5^-$  calculated at CCSD/6-311G(d)/LANL2DZ level of theory.

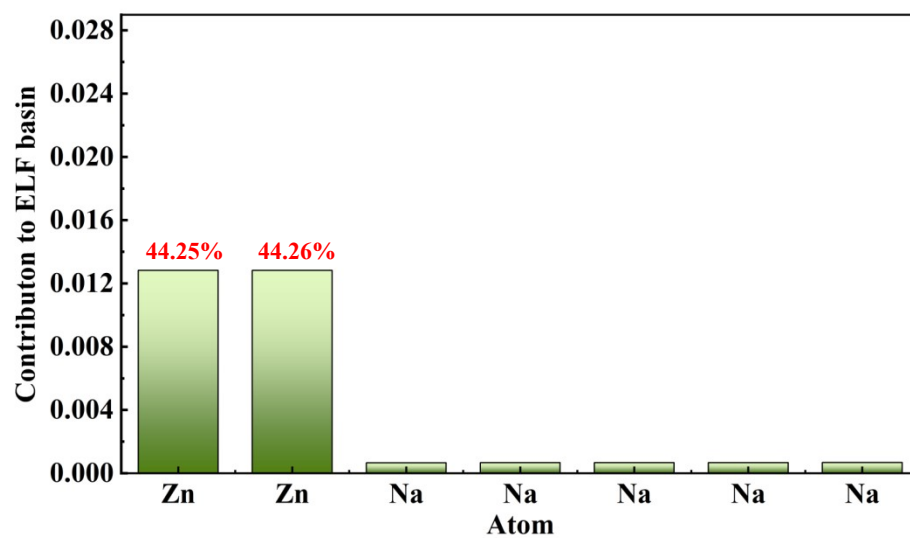

**Figure S8.** The diagram shows the contribution of each atom towards the Zn-Zn ELF basin in  $D_{5h}\text{-Zn}_2\text{Na}_5^-$ .

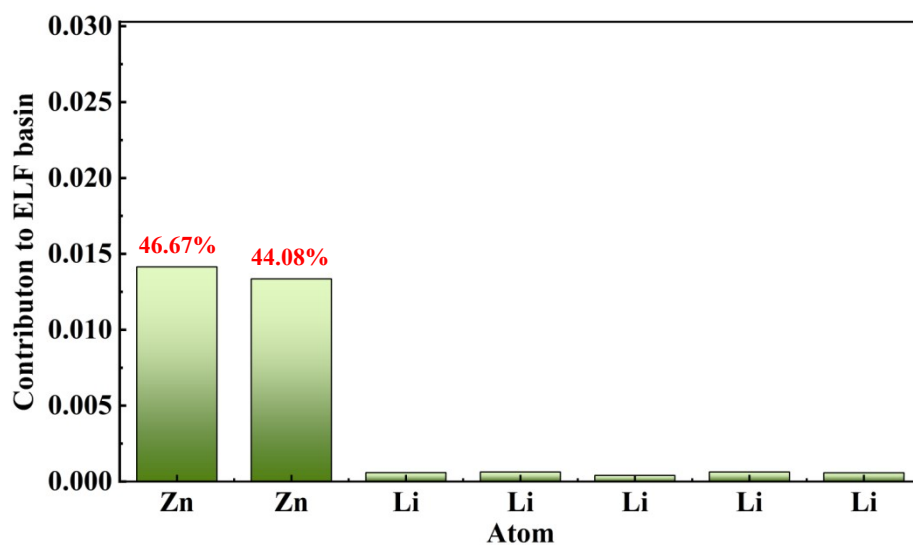

**Figure S9.** The diagram shows the contribution of each atom towards the Zn-Zn ELF basin in  $C_s\text{-Zn}_2\text{Li}_5^-$ .



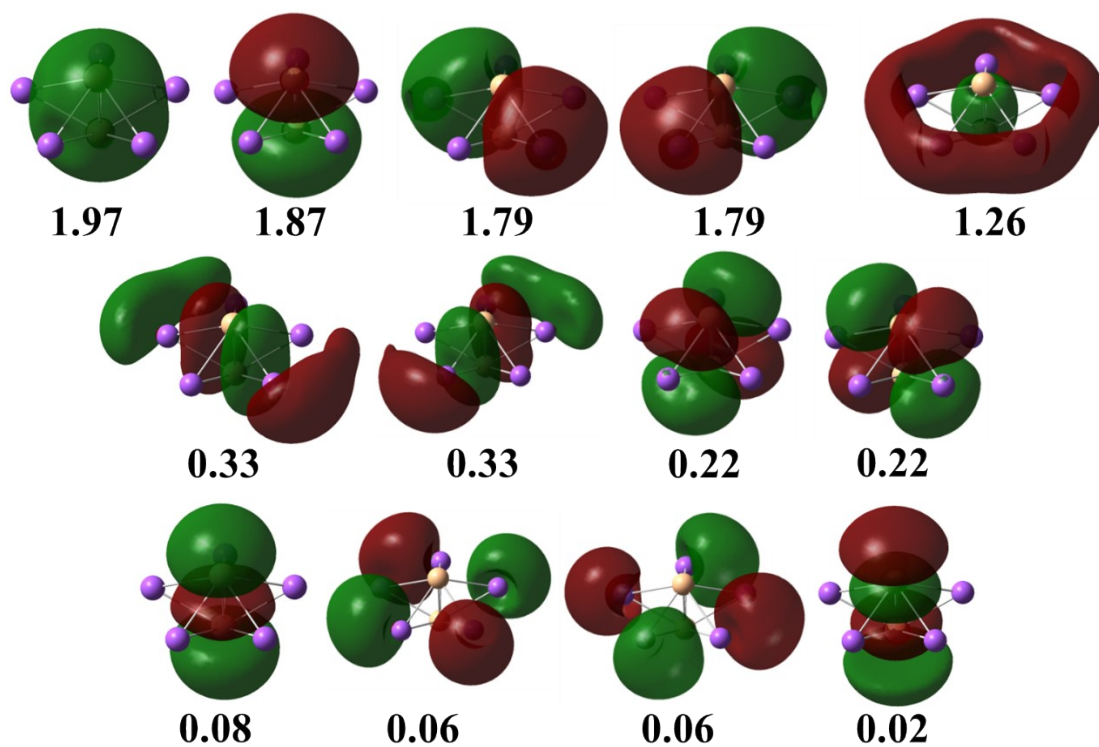

**Figure S10.** Natural orbitals of the global minimum isomer of  $\text{Zn}_2\text{Na}_5^-$  from CASSCF(10,13) and their occupation numbers.

## 2. Supplementary tables

**2.1. Table S1.** The lowest vibrational frequencies of  $D_{5h}$ - $Zn_2Na_5^-$ ,  $C_s$ - $Zn_2Li_5^-$  and  $C_s$ - $Zn_2Na_5^-$  are calculated at the CCSD/6-311G(d)/LANL2DZ level (LANL2DZ for Zn, 6-311G(d) for Na, Li).

| Molecules               | Structure                                                                         | Lowest vibrational frequency ( $cm^{-1}$ ) |
|-------------------------|-----------------------------------------------------------------------------------|--------------------------------------------|
| $D_{5h}$ - $Zn_2Na_5^-$ | 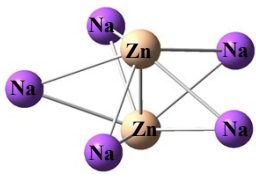 | 37.41                                      |
| $C_s$ - $Zn_2Li_5^-$    |  | 70.75                                      |

Note:  $C_s$ - $Zn_2Na_5^-$  exhibits an imaginary frequency, further optimization will yield a  $D_{5h}$  structure.

**2.2. Table S2.** The bond length ( $R_{\text{Zn-Zn}}$ ),  $\text{WBI}_{\text{Zn-Zn}}$ ,  $\text{FC}_{\text{Zn-Zn}}$ , Natural electronic configuration of Zn of Zn–Zn bonding systems. Structures calculated and analyzed at the TPSSh/6-311++G(d,p) level.

| Molecule                                                      | R (Å) | WBI   | FC (mDyn Å <sup>-1</sup> ) | Natural electronic configuration of Zn                              | NPA   |
|---------------------------------------------------------------|-------|-------|----------------------------|---------------------------------------------------------------------|-------|
| D <sub>5h</sub> -Zn <sub>2</sub> Na <sub>5</sub> <sup>-</sup> | 2.492 | 1.588 | 0.575                      | [core]4s <sup>1.49</sup> 3d <sup>10.00</sup> 4p <sup>1.46</sup>     | -0.97 |
| C <sub>2h</sub> -Zn <sub>2</sub> Na <sub>6</sub>              | 2.476 | 1.832 | 0.548                      | [core]4s <sup>1.38</sup> 3d <sup>10.0</sup> 4p <sup>1.86</sup>      | -1.25 |
| D <sub>4h</sub> -Zn <sub>2</sub> Na <sub>4</sub>              | 2.606 | 1.639 | 0.365                      | [core]4s <sup>1.47</sup> 3d <sup>10.04</sup> 4p <sup>1.57</sup>     | -1.05 |
| C <sub>s</sub> -Zn <sub>2</sub> Li <sub>5</sub> <sup>-</sup>  | 2.470 | 1.669 | 0.580                      | [core]4s <sup>1.26</sup> 3d <sup>9.99</sup> 4p <sup>1.45/2.02</sup> | -1.40 |
| C <sub>2h</sub> -Zn <sub>2</sub> Li <sub>6</sub>              | 2.480 | 1.613 | 0.538                      | [core]4s <sup>1.26</sup> 3d <sup>9.99</sup> 4p <sup>1.96</sup>      | -1.24 |
| D <sub>4h</sub> -Zn <sub>2</sub> Li <sub>4</sub>              | 2.519 | 1.588 | 0.497                      | [core]4s <sup>1.38</sup> 3d <sup>9.99</sup> 4p <sup>1.56</sup>      | -0.95 |
| Zn <sub>2</sub> (CO) <sub>4</sub> <sup>*</sup>                | 2.273 | 1.064 | 1.529                      | [core]4s <sup>0.82</sup> 3d <sup>9.94</sup> 4p <sup>1.29</sup>      | -0.06 |

**Note:** With an asterisk, the results were calculated to a single point on the same level for comparison.

**2.3. Table S3.** The bond length ( $R_{\text{Zn-Zn}}$ ),  $\text{WBI}_{\text{Zn-Zn}}$ ,  $\text{FC}_{\text{Zn-Zn}}$ , Natural electronic configuration of Zn of Zn–Zn bonding systems. Structures calculated and analyzed at the M06-2X/def2-TZVP level.

| Molecule                                                      | R (Å) | WBI   | FC (mDyn Å <sup>-1</sup> ) | Natural electronic configuration of Zn                                   | NPA   |
|---------------------------------------------------------------|-------|-------|----------------------------|--------------------------------------------------------------------------|-------|
| D <sub>5h</sub> -Zn <sub>2</sub> Na <sub>5</sub> <sup>-</sup> | 2.659 | 1.520 | 0.453                      | [core]4s <sup>1.44</sup> 3d <sup>10.00</sup> 4p <sup>1.41</sup>          | -0.89 |
| C <sub>2h</sub> -Zn <sub>2</sub> Na <sub>6</sub>              | 2.683 | 1.546 | 0.370                      | [core]4s <sup>1.35</sup> 3d <sup>10.0</sup> 4p <sup>1.73</sup>           | -1.09 |
| D <sub>4h</sub> -Zn <sub>2</sub> Na <sub>4</sub>              | 2.832 | 1.377 | 0.264                      | [core]4s <sup>1.46</sup> 3d <sup>10.0</sup> 4p <sup>1.40</sup>           | -0.89 |
| C <sub>s</sub> -Zn <sub>2</sub> Li <sub>5</sub> <sup>-</sup>  | 2.630 | 1.426 | 0.456                      | [core]4s <sup>1.21/1.25</sup> 3d <sup>10.0</sup> 4p <sup>1.38/1.81</sup> | -1.09 |
| C <sub>2h</sub> -Zn <sub>2</sub> Li <sub>6</sub>              | 2.643 | 1.326 | 0.419                      | [core]4s <sup>1.18</sup> 3d <sup>10.0</sup> 4p <sup>1.82</sup>           | -1.01 |
| D <sub>4h</sub> -Zn <sub>2</sub> Li <sub>4</sub>              | 2.678 | 1.371 | 0.390                      | [core]4s <sup>1.33</sup> 3d <sup>10.0</sup> 4p <sup>1.42</sup>           | -0.76 |
| Zn <sub>2</sub> (CO) <sub>4</sub> <sup>*</sup>                | 2.273 | 1.192 | --                         | [core]4s <sup>0.77</sup> 3d <sup>9.96</sup> 4p <sup>1.39</sup>           | -0.12 |

**Note:** With an asterisk, the results were calculated to a single point on the same level for comparison.

**2.4. Table S4a.** Orbital and component analysis of  $D_{5h}$ - $Zn_2Na_5^-$  structures. Computed at the CCSD/6-311G(d)/LANL2DZ level (LANL2DZ for Zn, 6-311G(d) for Na).

| Orbital                 | HOMO                                                                              | HOMO-1                                                                             | HOMO-2                                                                              |
|-------------------------|-----------------------------------------------------------------------------------|------------------------------------------------------------------------------------|-------------------------------------------------------------------------------------|
| $D_{5h}$ - $Zn_2Na_5^-$ | 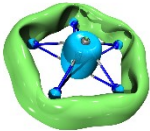 |  |  |
| E/eV                    | -0.751                                                                            | -2.191                                                                             | -2.191                                                                              |
| Component               | $Zn_1 \odot 4s \sim 5.52\%$                                                       |                                                                                    |                                                                                     |
|                         | $Zn_1 \odot 4p \sim 0.61\%$                                                       | $Zn_1 \odot 4p \sim 27.89\%$                                                       | $Zn_1 \odot 4p \sim 27.89\%$                                                        |
|                         | $Zn_2 \odot 4s \sim 5.52\%$                                                       | $Zn_2 \odot 4p \sim 27.89\%$                                                       | $Zn_2 \odot 4p \sim 27.89\%$                                                        |
|                         | $Zn_2 \odot 4p \sim 0.61\%$                                                       | $Na \odot 3s \sim 33.80\%$                                                         | $Na \odot 3s \sim 31.15\%$                                                          |
|                         | $Na \odot 3s \sim 78.65\%$                                                        |                                                                                    |                                                                                     |

**Table S4b.** Orbital and component analysis of  $Cs$ - $Zn_2Li_5^-$  structures. Computed at the CCSD/6-311G(d)/LANL2DZ level (LANL2DZ for Zn, 6-311G(d) for Li).

| Orbital             | HOMO                                                                                | HOMO-1                                                                              | HOMO-2                                                                                |
|---------------------|-------------------------------------------------------------------------------------|-------------------------------------------------------------------------------------|---------------------------------------------------------------------------------------|
| $Cs$ - $Zn_2Li_5^-$ | 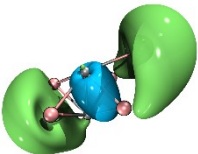 |  |  |
| E/eV                | -0.618                                                                              | -1.986                                                                              | -2.502                                                                                |
| Component           | $Zn_1 \odot 4p \sim 10.99\%$                                                        | $Zn_1 \odot 4p \sim 29.36\%$                                                        | $Zn_1 \odot 4s \sim 2.49\%$                                                           |
|                     | $Zn_2 \odot 4s \sim 4.05\%$                                                         | $Zn_2 \odot 4p \sim 36.05\%$                                                        | $Zn_1 \odot 4p \sim 17.73\%$                                                          |
|                     | $Zn_2 \odot 4p \sim 2.89\%$                                                         | $Li \odot 2s \sim 21.88\%$                                                          | $Zn_2 \odot 4s \sim 5.16\%$                                                           |
|                     | $Li \odot 2s \sim 66.81\%$                                                          | $Li \odot 2p \sim 10.87\%$                                                          | $Zn_2 \odot 4p \sim 34.46\%$                                                          |
|                     | $Li \odot 2p \sim 13.60\%$                                                          |                                                                                     | $Li \odot 2p \sim 10.87\%$                                                            |

**Table S4c.** Orbital and component analysis of  $C_{2h}$ - $Zn_2Li_6$  structures. Computed at the CCSD/6-311G(d)/LANL2DZ level (LANL2DZ for Zn, 6-311G(d) for Li).

| Orbital               | HOMO                                                                              | HOMO-1                                                                            | HOMO-2                                                                              |
|-----------------------|-----------------------------------------------------------------------------------|-----------------------------------------------------------------------------------|-------------------------------------------------------------------------------------|
| $C_{2h}$ - $Zn_2Li_6$ | 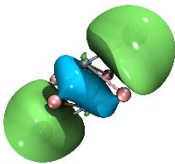 |  |  |
| E/eV                  | -4.240                                                                            | -4.687                                                                            | -5.262                                                                              |
| Component             |                                                                                   |                                                                                   | $Zn_1@4s \sim 8.03\%$                                                               |
|                       | $Zn_1@4p \sim 14.49\%$                                                            | $Zn_1@4p \sim 32.60\%$                                                            | $Zn_1@4p \sim 23.61\%$                                                              |
|                       | $Zn_2@4p \sim 14.49\%$                                                            | $Zn_2@4p \sim 32.60\%$                                                            | $Zn_2@4s \sim 8.03\%$                                                               |
|                       | $Li@2s \sim 48.89\%$                                                              | $Li@2s \sim 21.57\%$                                                              | $Zn_2@4p \sim 23.61\%$                                                              |
|                       | $Li@2p \sim 17.69\%$                                                              | $Li@2p \sim 10.32\%$                                                              | $Li@2s \sim 20.17\%$                                                                |
|                       |                                                                                   |                                                                                   | $Li@2p \sim 13.43\%$                                                                |

**Table S4d.** Orbital and component analysis of  $C_{2h}$ - $Zn_2Na_6$  structures. Computed at the CCSD/6-311G(d)/LANL2DZ level (LANL2DZ for Zn, 6-311G(d) for Na).

| Orbital               | HOMO                                                                                | HOMO-1                                                                              | HOMO-2                                                                                |
|-----------------------|-------------------------------------------------------------------------------------|-------------------------------------------------------------------------------------|---------------------------------------------------------------------------------------|
| $C_{2h}$ - $Zn_2Na_6$ | 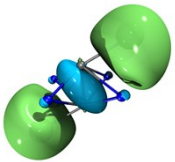 |  |  |
| E/eV                  | -3.739                                                                              | -4.472                                                                              | -4.921                                                                                |
| Component             | $Zn_1@4s \sim 2.39\%$                                                               |                                                                                     | $Zn_1@4s \sim 4.61\%$                                                                 |
|                       | $Zn_1@4p \sim 8.81\%$                                                               | $Zn_1@4p \sim 36.05\%$                                                              | $Zn_1@4p \sim 27.21\%$                                                                |
|                       | $Zn_2@4s \sim 2.39\%$                                                               | $Zn_2@4p \sim 36.05\%$                                                              | $Zn_2@4s \sim 4.61\%$                                                                 |
|                       | $Zn_2@4p \sim 8.81\%$                                                               | $Na@3s \sim 19.75\%$                                                                | $Zn_2@4p \sim 27.21\%$                                                                |
|                       | $Na@3s \sim 65.63\%$                                                                | $Na@3p \sim 2.94\%$                                                                 | $Na@3s \sim 25.66\%$                                                                  |
|                       | $Na@3p \sim 6.31\%$                                                                 |                                                                                     | $Na@3p \sim 7.90\%$                                                                   |

Note: “ $Zn_1$ ” denotes the Zn atom located above and “ $Zn_2$ ” denotes the Zn atom located below.

**2.5. Table S5.** Topological parameters of electron density,  $\rho$ , laplacian of electron density,  $\nabla^2\rho$ , local electronic energy density,  $H(r)$ , ratio of potential energy density to kinetic energy density,  $|V(r)|/G(r)$ . Every value is in Au. Computed at TPSSh/6-311++G(d,p).

| Molecule                          | $\rho$ | $\nabla^2\rho$ | $H(r)$ | $ V(r) /G(r)$ |
|-----------------------------------|--------|----------------|--------|---------------|
| $D_{5h}\text{-Zn}_2\text{Na}_5^-$ | 0.042  | 0.058          | -0.013 | 1.47          |
| $C_s\text{-Zn}_2\text{Li}_5^-$    | 0.045  | 0.062          | -0.014 | 1.48          |
| $C_{2h}\text{-Zn}_2\text{Li}_6$   | 0.045  | 0.060          | -0.014 | 1.50          |
| $C_{2h}\text{-Zn}_2\text{Na}_6$   | 0.044  | 0.056          | -0.014 | 1.50          |
| $D_{4h}\text{-Zn}_2\text{Li}_4$   | 0.038  | 0.070          | -0.010 | 1.37          |
| $D_{4h}\text{-Zn}_2\text{Na}_4$   | 0.032  | 0.059          | -0.007 | 1.32          |
| $\text{Zn}_2(\text{CO})_4^*$      | 0.069  | 0.052          | -0.030 | 1.70          |

**Note:** With an asterisk, the results were calculated to a single point on the same level for comparison.

**Scheme S1.** Cartesian coordinates of the optimized geometries

**D<sub>5h</sub>-Zn<sub>2</sub>Na<sub>5</sub><sup>-</sup>**

|    |             |             |             |
|----|-------------|-------------|-------------|
| Na | -2.92789900 | 0.11523100  | 0.00056200  |
| Na | 2.30090200  | -1.81415300 | -0.00025300 |
| Na | -0.79508000 | 2.81998700  | -0.00010400 |
| Na | -1.01430900 | -2.74877000 | -0.00021500 |
| Na | 2.43642800  | 1.62762100  | -0.00007800 |
| Zn | 0.00009400  | -0.00002500 | 1.32335900  |
| Zn | -0.00010900 | 0.00005600  | -1.32332700 |

**C<sub>s</sub>-Zn<sub>2</sub>Li<sub>5</sub><sup>-</sup>**

|    |             |             |             |
|----|-------------|-------------|-------------|
| Li | -0.60627300 | 1.78626300  | 1.57275300  |
| Li | 0.35854600  | -1.47778200 | -1.65674500 |
| Li | 2.83554900  | -2.02341700 | -0.00010900 |
| Li | 0.35905100  | -1.47744500 | 1.65702400  |
| Li | -0.60655400 | 1.78525300  | -1.57363400 |
| Zn | -1.38086800 | -0.29077400 | 0.00009600  |
| Zn | 1.14683600  | 0.43148700  | -0.00002500 |
